# Supplementary material for: No severe ozone depletion in the tropical stratosphere in recent decades
Source: Copernicus journal article supplement (doi:10.5194/acp-24-6743-2024), 2024-06-12
Supplement: Supplementary file 1 [file acp-24-6743-2024-supplement.pdf]

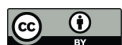

*Supplement of*

## **No severe ozone depletion in the tropical stratosphere in recent decades**

**Jayanarayanan Kuttippurath et al.**

*Correspondence to:* Jayanarayanan Kuttippurath ([jayan@coral.iitkgp.ac.in](mailto:jayan@coral.iitkgp.ac.in))

The copyright of individual parts of the supplement might differ from the article licence.

33 DATA

34 MERRA-2 and ERA-5 Reanalyses

35 MERRA–2 (Modern Era Retrospective analysis for Research and Analysis-2) is a reanalysis data  
36 developed at the Global Modelling and Assimilation office (GMAO). These data have 72 sigma pressure  
37 vertical layers with a spatial resolution of  $0.625^{\circ} \times 0.5^{\circ}$  (Bosilovich et al., 2015) and are available from  
38 1980 onwards. The reanalysis also assimilates data from Infrared Atmospheric Sounding Interferometer  
39 (IASI) and Cross Infrared Sounding and Advanced Technology Microwave Sounder on board Suomi NPP.  
40 An adaptive bias correction scheme is also applied to the radiance data while assimilating the datasets  
41 in MERRA–2. A comprehensive discussion on this assimilation system is given in Gelaro et al. (2016).

42 We have also used the ECMWF Reanalysis 5<sup>th</sup> Generation (ERA-5) data, which has 137 vertical hybrid  
43 sigma pressure levels, and extends from the surface to 0.01 hPa. We use the monthly gridded data at a  
44  $0.25^{\circ} \times 0.25^{\circ}$  resolution for the period 1984–2022 (Hersbach et al., 2019). Here, the ozone mass mixing  
45 ratio (MMR) in  $\text{kg kg}^{-1}$  is converted to parts per million (ppm) by multiplying it with the dividend of molar  
46 mass of dry air (28.9644) and molar mass of ozone (47.9982). However, from the middle to upper  
47 stratosphere, these ozone profiles show a bias within  $\pm 20\%$  compared to the observations, whereas,  
48 the biases are even up to about 50% in the UTLS region (SPARC, 2017).

49

50 **Table S1:** The location of SHADOZ ozonesonde observations.

| Location                      | Abbreviation | Latitude in ° | Longitude in ° |
|-------------------------------|--------------|---------------|----------------|
| Ascension, UK                 | Ascen        | -7.56         | -14.22         |
| Suva, Fiji                    | Fiji         | -18.10        | 178.40         |
| Hilo, Hawaii                  | Hilo         | 19.40         | -155.40        |
| Irene, S. Africa              | Irene        | -25.90        | 28.20          |
| Watakosek, Java,<br>Indonesia | Java         | -7.60         | 112.70         |
| Kuala Lumpur,<br>Malaysia     | Kuala        | 2.73          | 101.70         |
| Nairobi, Kenya                | Nairobi      | -1.30         | 36.80          |
| Natal, Brazil                 | Natal        | -5.40         | -35.40         |
| Paramaribo, Surinam           | Paramaribo   | 5.80          | -55.21         |
| La Reunion Is, France         | Reunion      | -21.10        | 55.50          |
| Pago Pago, Am. Samoa          | Samoa        | -14.20        | -170.60        |
| San Cristobal,<br>Galapagos   | San Crist    | -0.92         | -89.60         |

51

52

53

54

55

56

57

58 **Table S2:** The trends (ppm yr<sup>-1</sup>) at different altitude levels from GOZCARDS, SWOOSH and Reanalysis  
 59 datasets (MERRA-2 and ERA-5) for the pre-1997 and post-1997 periods. Here, DJF is December-January-  
 60 February, MAM is March-April-May, JJA is June-July-August and SON is September-October-December.

61

|                                                             | Altitude | GOZCARDS<br>(1984-2021) | SWOOSH<br>(1984-2022) | ERA-5<br>(1984-2022) | MERRA-2<br>(1984-2022) |
|-------------------------------------------------------------|----------|-------------------------|-----------------------|----------------------|------------------------|
| <b>Pre-1997<br/>(1984–1997)</b>                             |          |                         |                       |                      |                        |
| <b>DJF</b>                                                  | 100 hPa  | 0.0000                  | -0.0046               | -0.0001              | -0.0004                |
|                                                             | 10 hPa   | 0.0023                  | -0.0616               | 0.0087               | -0.0264                |
|                                                             | 1 hPa    | -0.0058                 | -0.0091               | 0.0156               | -0.0001                |
| <b>MAM</b>                                                  | 100 hPa  | -0.0006                 | -0.0026               | -0.0001              | -0.0004                |
|                                                             | 10 hPa   | -0.0005                 | -0.0258               | 0.0055               | -0.0236                |
|                                                             | 1 hPa    | -0.0067                 | -0.0125               | 0.0152               | 0.0000                 |
| <b>JJA</b>                                                  | 100 hPa  | 0.0012                  | -0.0019               | -0.0005              | -0.0013                |
|                                                             | 10 hPa   | -0.0106                 | -0.0718               | 0.0101               | -0.0074                |
|                                                             | 1 hPa    | 0.0017                  | -0.0089               | 0.0155               | -0.0001                |
| <b>SON</b>                                                  | 100 hPa  | -0.0005                 | 0.0037                | 0.0001               | -0.0008                |
|                                                             | 10 hPa   | 0.0025                  | -0.011                | 0.0088               | -0.0161                |
|                                                             | 1 hPa    | -0.0068                 | -0.0088               | 0.0143               | -0.0001                |
| <b>Post-1997<br/>(1998–2022 and 1998–2021 for GOZCARDS)</b> |          |                         |                       |                      |                        |
| <b>DJF</b>                                                  | 100 hPa  | -0.0008                 | 0.0003                | -0.0006              | -0.0010                |
|                                                             | 10 hPa   | 0.0029                  | 0.0032                | 0.0006               | -0.0137                |
|                                                             | 1 hPa    | -0.0011                 | -0.0026               | -0.0020              | 0.0041                 |
| <b>MAM</b>                                                  | 100 hPa  | -0.0003                 | 0.0003                | -0.0005              | -0.0008                |
|                                                             | 10 hPa   | 0.014                   | 0.0144                | 0.0024               | -0.0126                |
|                                                             | 1 hPa    | -0.0001                 | -0.0006               | 0.007                | 0.0046                 |
| <b>JJA</b>                                                  | 100 hPa  | 0.0007                  | 0.0003                | -0.0009              | -0.0012                |
|                                                             | 10 hPa   | -0.0049                 | -0.0024               | -0.0060              | -0.0160                |
|                                                             | 1 hPa    | 0.0033                  | -0.0004               | 0.0011               | 0.0045                 |
| <b>SON</b>                                                  | 100 hPa  | 0.0000                  | 0.0003                | -0.0012              | -0.0013                |
|                                                             | 10 hPa   | -0.0021                 | -0.0095               | -0.0031              | -0.0174                |
|                                                             | 1 hPa    | 0.0012                  | 0.0003                | 0.0008               | 0.0049                 |

62

63

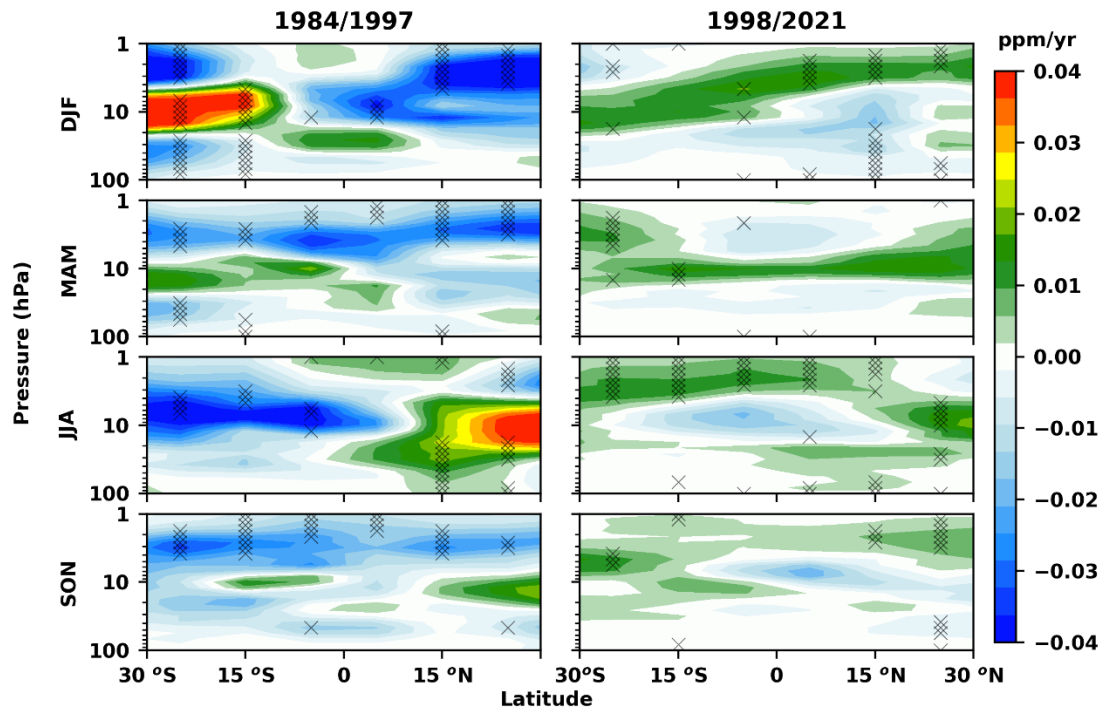

64

65 **Figure S1:** Trends in mixing ratio of ozone estimated for each season using the GOZCARDS data for the  
 66 periods 1984–1997 and 1998–2021. The stippled regions are statistically significant at the 95% CI. Here,  
 67 DJF is December-January-February, MAM is March-April-May, JJA is June-July-August and SON is  
 68 September-October-December.

69

70

71

72

73

74

75

76

77

78

79

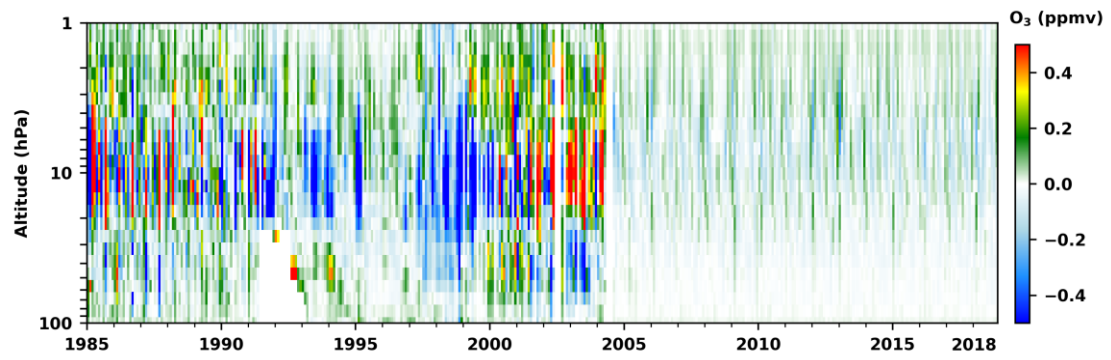

80

81

82

**Figure S2:** The difference in ozone estimated between GOZCARDS and SWOOSH ozone datasets for each month since 1985.

83

84

85

86

87

88

89

90

91

92

93

94

95

96

97

98

99

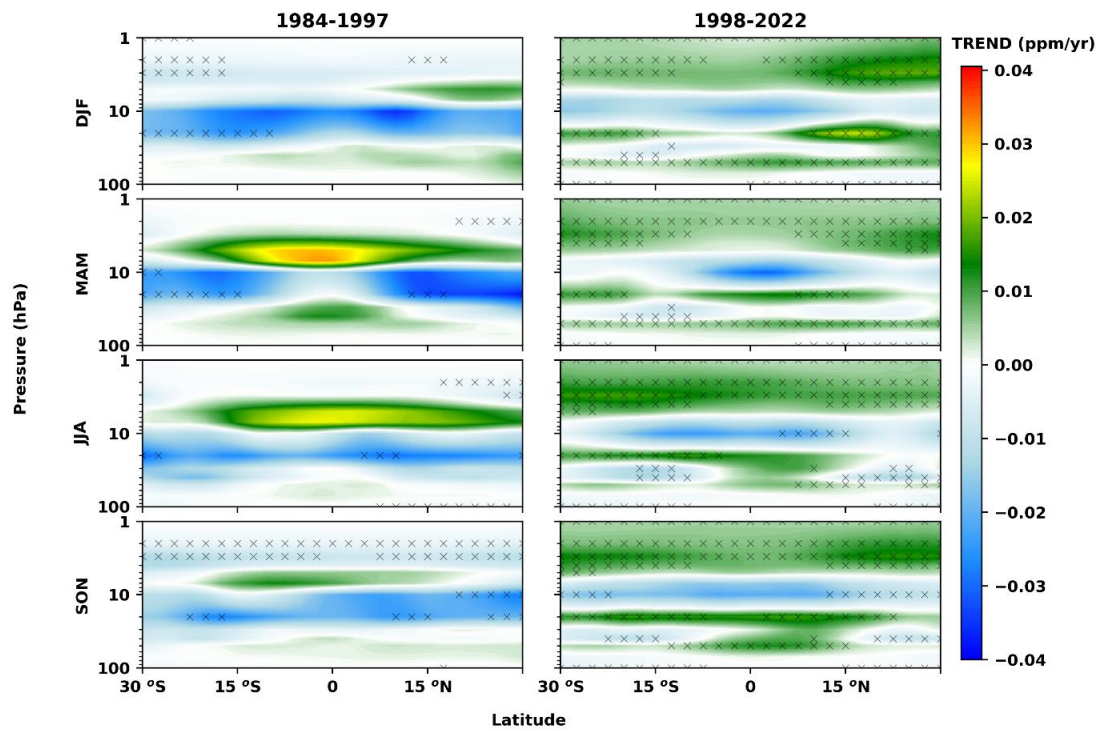

100

101 **Figure S3:** Trends in mixing ratio of ozone estimated for each season from MERRA-2 data for the periods  
 102 1984–1996 and 1997–2022. The stippled regions are statistically significant at the 95% CI. Here, DJF is  
 103 December-January-February, MAM is March-April-May, JJA is June-July-August and SON is September-  
 104 October-December.

105

106

107

108

109

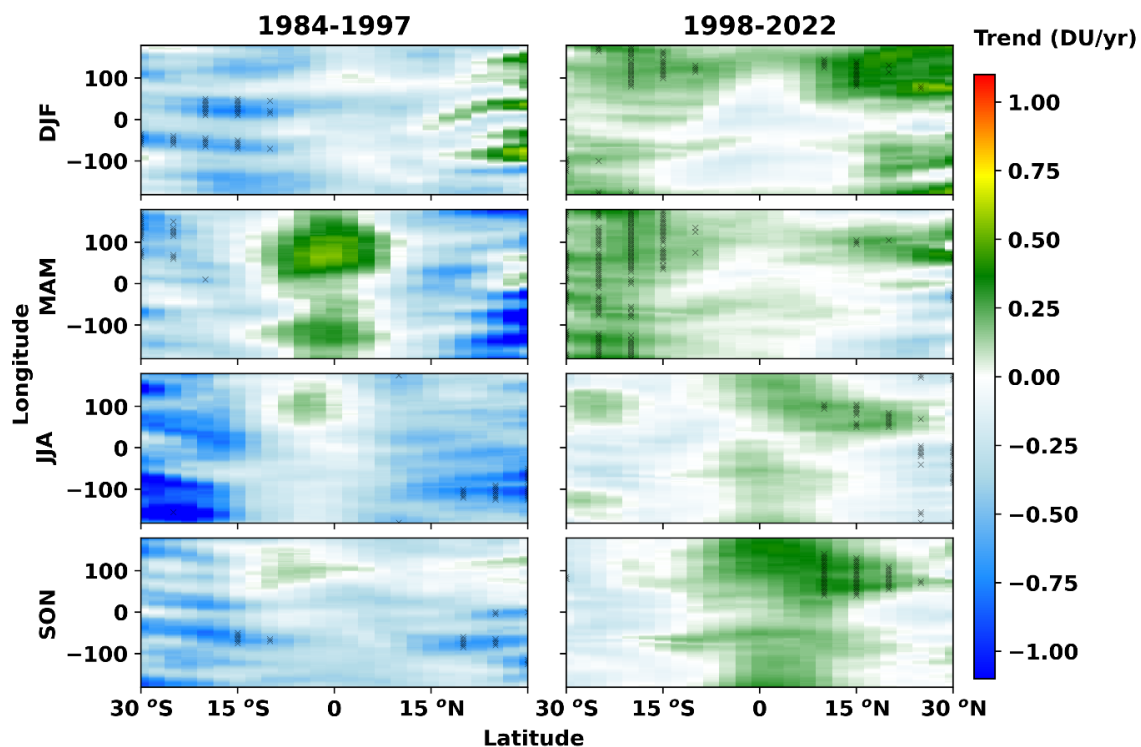

110

111 **Figure S4:** Trends in TCO estimated using the seasonally averaged data from MERRA-2 for the periods  
 112 1984–1997 and 1998–2022. The stippled regions are statistically significant at the 95% CI. Here, DJF is  
 113 December-January-February, MAM is March-April-May, JJA is June-July-August and SON is September-  
 114 October-December.

115

116

117 We have examined the MERRA-2 reanalysis (Table S2 and Fig. S3) to find the trends in ozone. The trends  
 118 are statistically nonsignificant in both periods, except in the topmost altitudes in the upper stratosphere  
 119 (Table S2). The trends estimated are nonsignificant at most altitudes and seasons during the 1984–1997  
 120 period. However, the trends are significant in the upper stratosphere in SON, but the values are very  
 121 small, within  $0.01 \text{ ppmv yr}^{-1}$ . The trends in the post-1997 period are positive and significant in the lower  
 122 and upper stratosphere, about  $0.01 \text{ ppmv yr}^{-1}$ , but those in the middle stratosphere are negative and  
 123 nonsignificant. The TCO trends (Fig. S4) also show insignificant negative trends in most regions and  
 124 seasons, except around the equatorial region, in MAM during 1984–1997. The trend estimated for the  
 125 next two decades are either positive ( $0.25 \pm 0.50 \text{ DU yr}^{-1}$ ; Fig. S4) or neutral, but significant only at  $15^\circ$ –  
 126  $30^\circ \text{ S}$  at MAM.

127

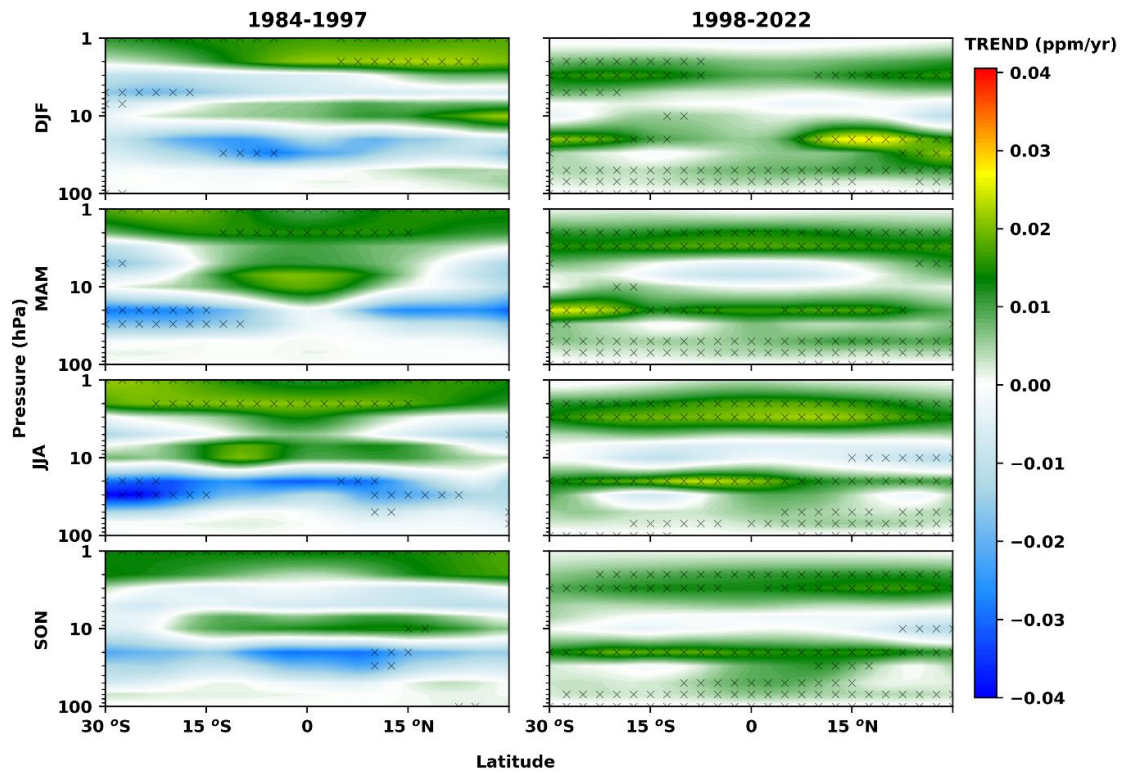

128

129 **Figure S5:** Trends in mixing ratio of ozone estimated for each season from ERA-5 data for the periods  
 130 1984–1996 and 1997–2022. The stippled regions are statistically significant at the 95% CI. Here, DJF is  
 131 December-January-February, MAM is March-April-May, JJA is June-July-August and SON is September-  
 132 October-December.

133

134

135

136

137

138

139

140

141

142



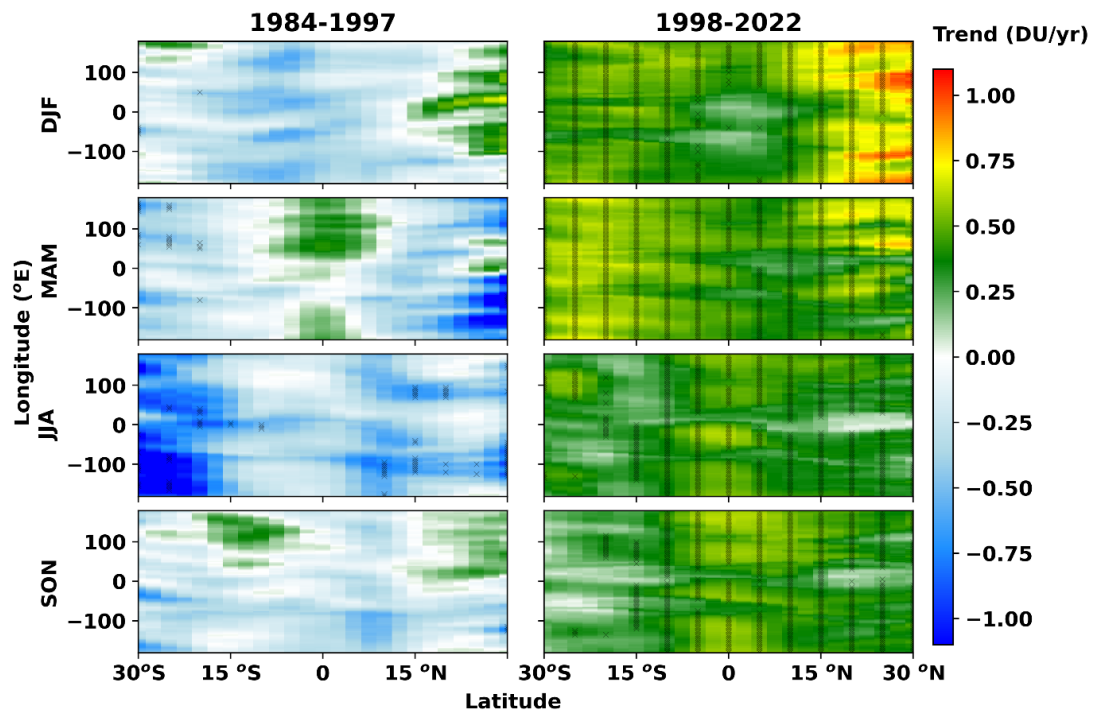

143

144 **Figure S6:** Trends in TCO estimated using the seasonally averaged data from ERA-5 for the periods 1984–  
 145 1997 and 1998–2022. The hatched regions are statistically significant at the 95% CI. Here, DJF is  
 146 December-January-February, MAM is March-April-May, JJA is June-July-August and SON is September-  
 147 October-December.

148

149

150 The analyses with ERA-5 also yield similar trend estimates as for the MERRA-2 data in both periods  
 151 (Table S2 and Fig. S5). The trends estimated with the TCO data for the 1984–1997 period show similar  
 152 values. Conversely, the trends in the post-1998 period show consistently higher values of about 0.5 DU  
 153  $\text{yr}^{-1}$  and are statistically significant at most latitudes (Fig. S6).

154

155

156

157

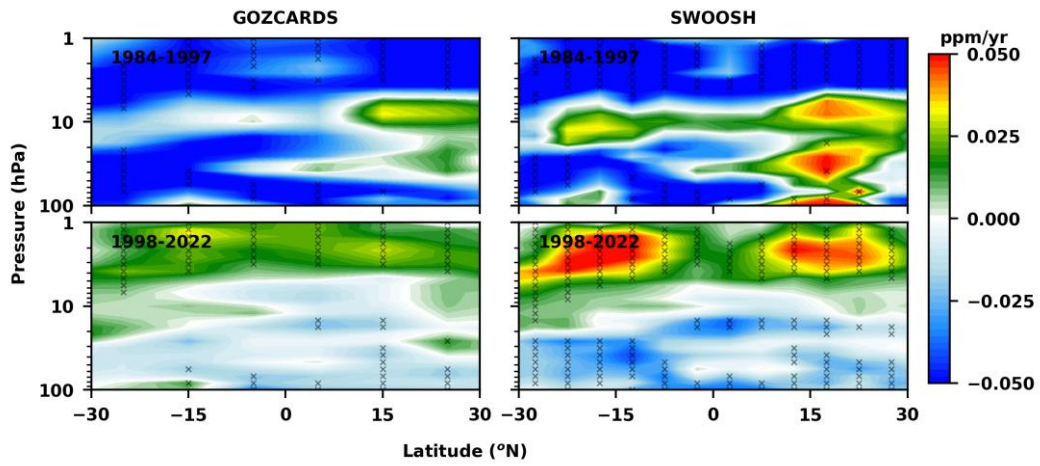

158

159 **Figure S7:** Trends in the annually averaged ozone estimated using the Multiple Linear Regression  
 160 (MLR) model with GOZCARDS and SWOOSH data for the periods 1984–1997 and 1998–2022. The  
 161 stippled regions are statistically significant at the 95% CI.

162

163

164

165

166

167

168

169

170

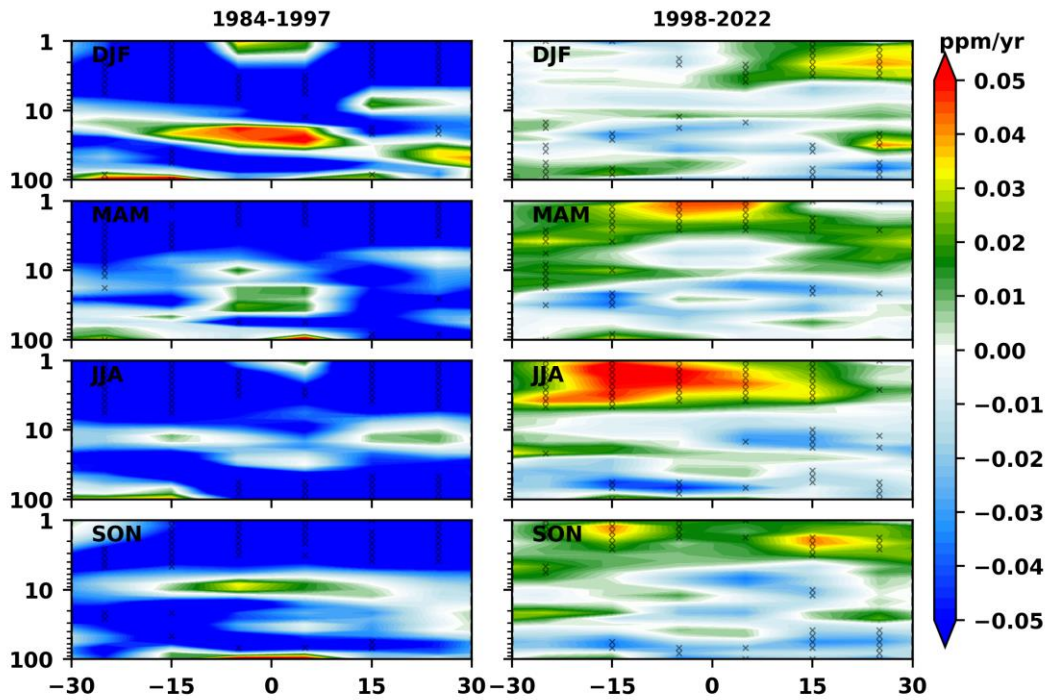

171

172 **Figure S8:** Trends in mixing ratio of ozone estimated using a multiple linear regression model for each  
 173 season using the GOZCARDS data for the periods 1984–1997 and 1998–2021. The stippled regions are  
 174 statistically significant at the 95% CI. Here, DJF is December-January-February, MAM is March-April-  
 175 May, JJA is June-July-August and SON is September-October-December.

176

177

178

179

180

181

182

183

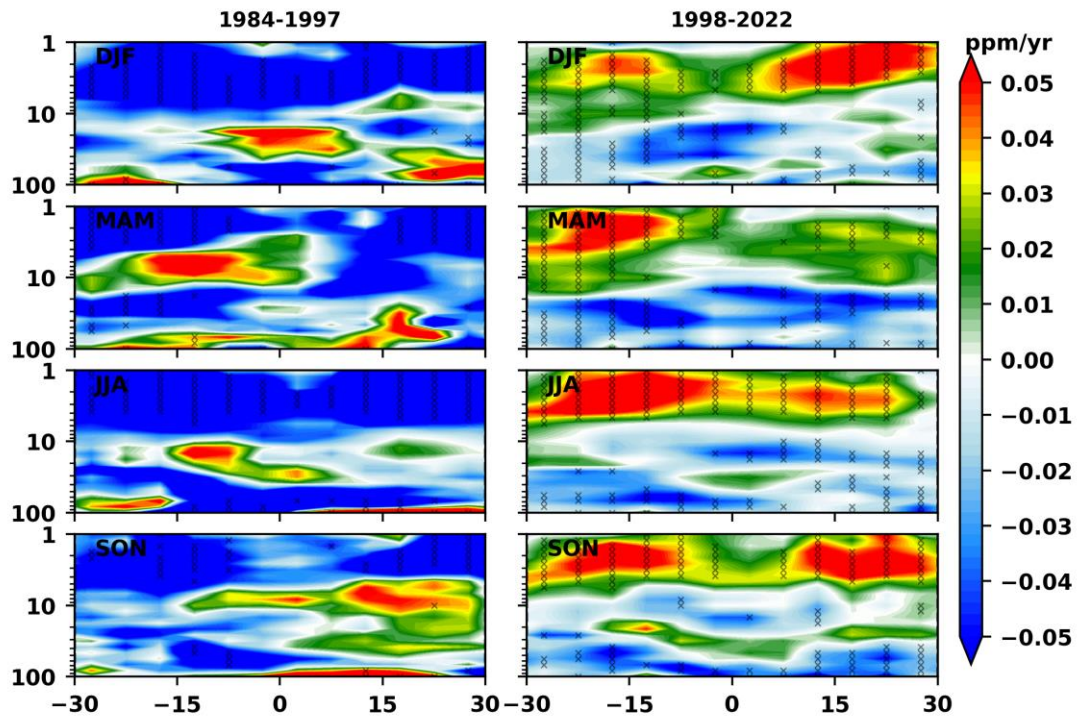

184

185 **Figure S9:** Trends in mixing ratio of ozone estimated for each season using the SWOOSH data by applying  
 186 a multiple linear regression model for the periods 1984–1997 and 1998–2022. The stippled regions are  
 187 statistically significant at the 95% CI.

188

189

190

191

192

193

194

195

196

197

198

199

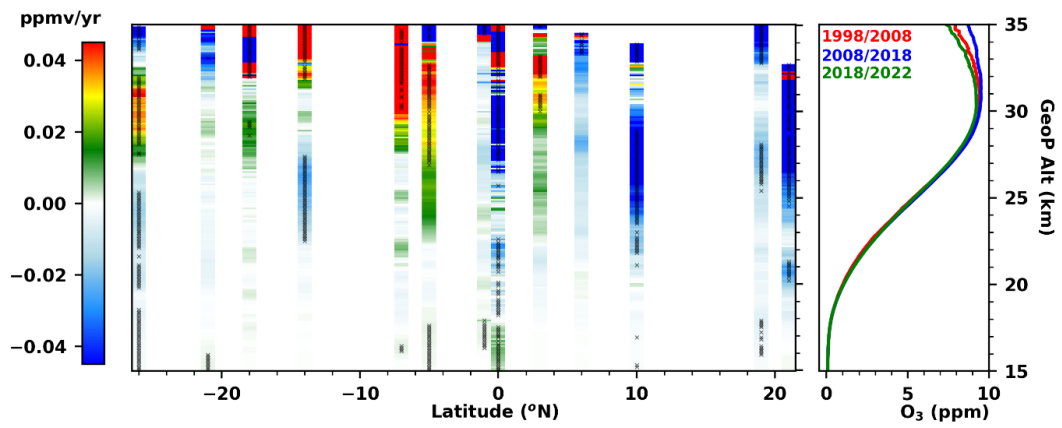

200

201

202

203

**Figure S10:** The latitudinal distribution of vertical trends in ozone estimated using the SHADOZ observations for the period 1998–2022. The average of ozonesonde profiles in different periods is shown on the right. The stippled regions are statistically significant at the 95% CI.

204

205

206

207

208

209

210

211

212

213

214

215

216

217

218

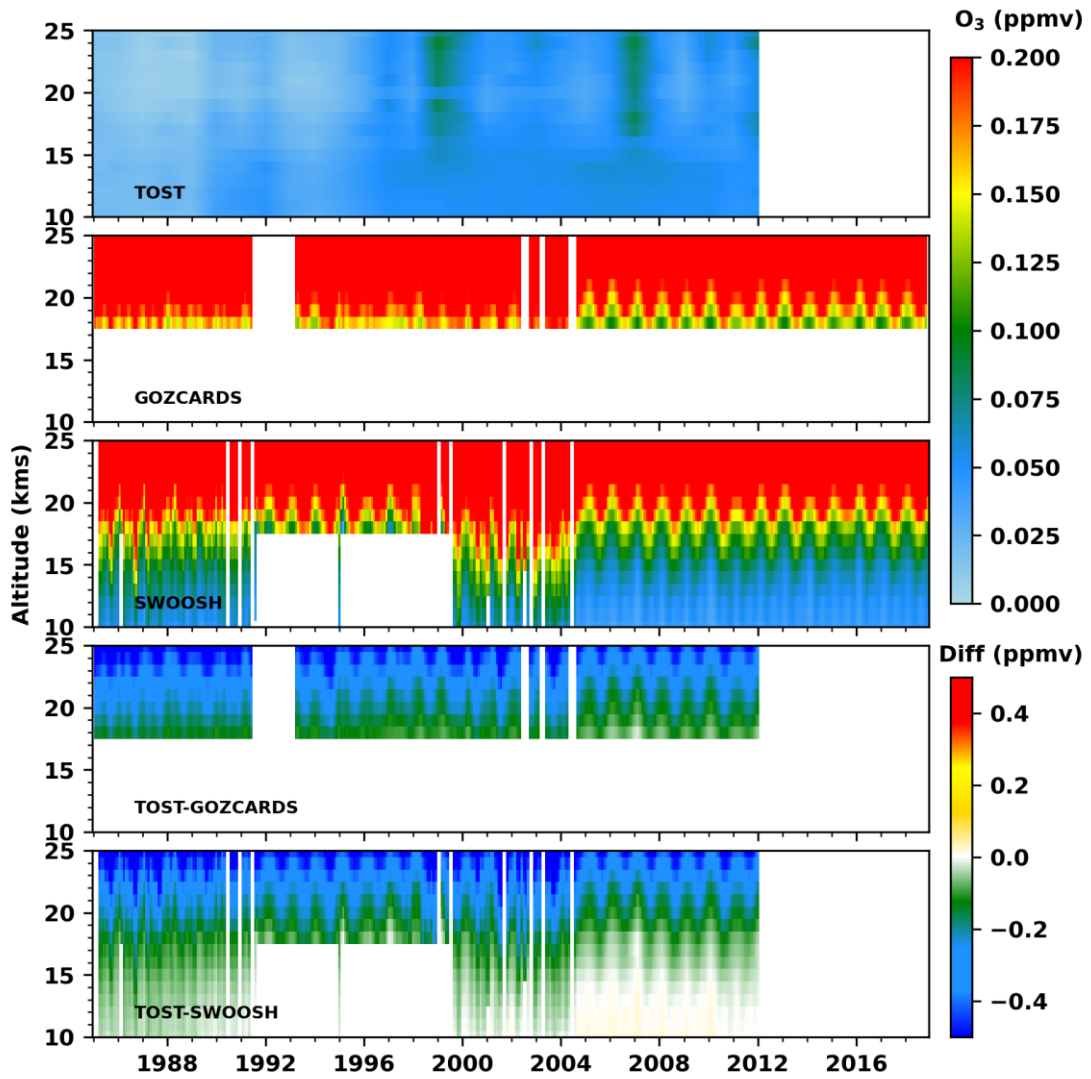

219

220

221

222

223

224

**Figure S11:** Yearly averaged ozone values in the TOST, GOZCARDS and SWOOSH data (top three panels), and the difference in ozone values found between TOST and GOZCARDS and TOST and SWOOSH (bottom two panels) data sets.

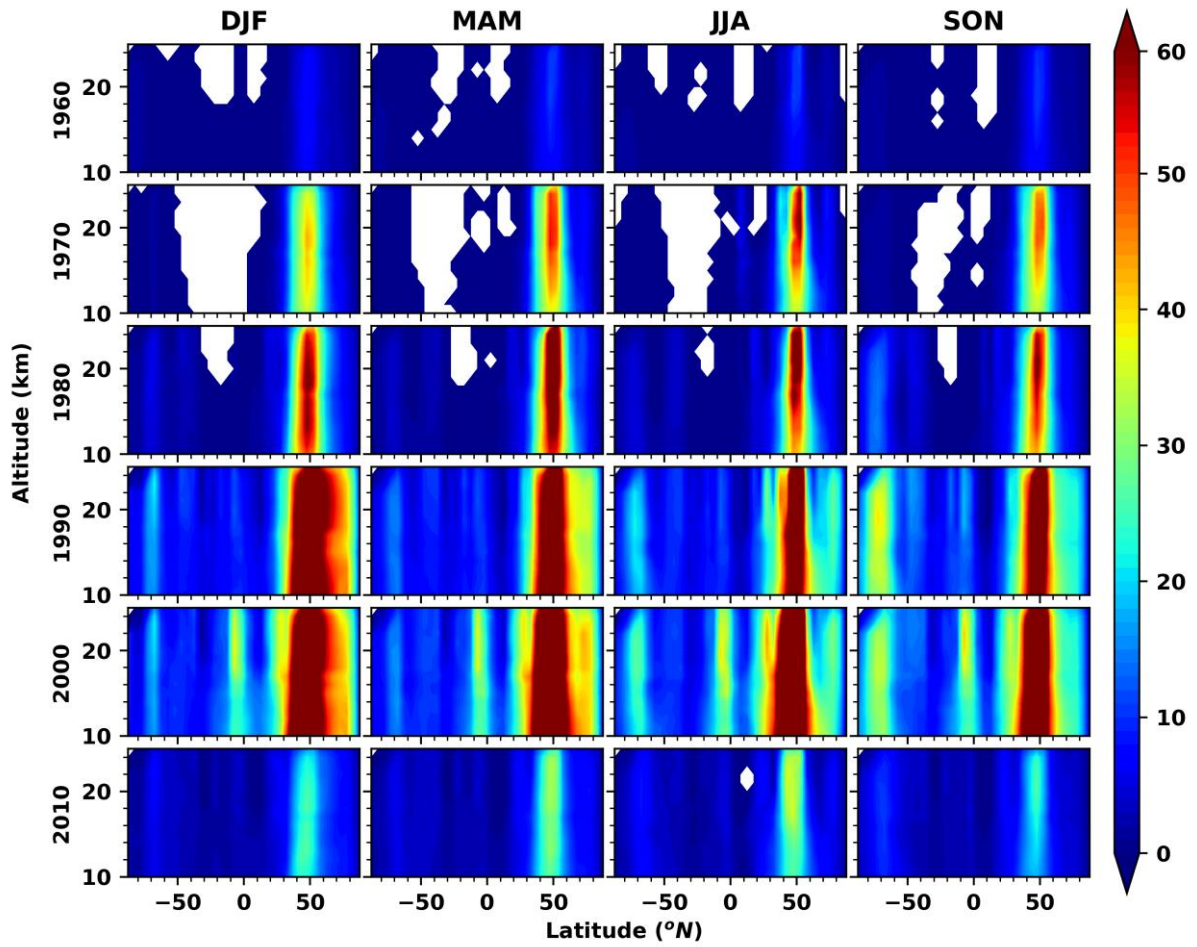

225

226

Figure S12: The number of profiles in TOST data in each period and altitude.

227

228

229

230

231

232

233

234

235

236

237

238

239

240
